# Supplementary material for: Comparative immunogenicity and efficacy of equivalent outer membrane vesicle and glycoconjugate vaccines against nontyphoidal Salmonella
Source: PubMed Central journal article supplement — Proc Natl Acad Sci U S A. 2018 Sep 27;115(41):10428–33. doi: 10.1073/pnas.1807655115 (PMC6187145; doi:10.1073/pnas.1807655115), 2018-09-27
Supplement: pnas.1807655115.sapp.pdf [file pnas.1807655115.sapp.pdf]

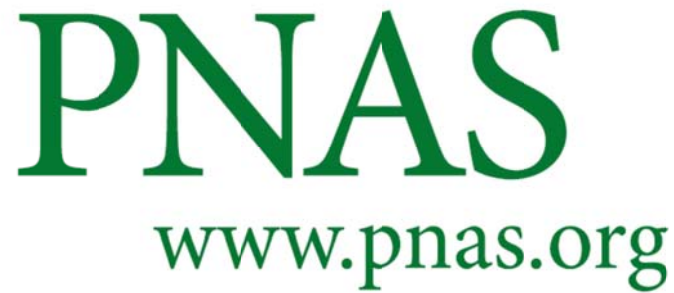

## Supplementary Information for

Comparative immunogenicity and efficacy of equivalent outer membrane vesicle and glycoconjugate vaccines against nontyphoidal *Salmonella*

F. Micoli, S. Rondini, R. Alfini, L. Lanzilao, F. Necchi, A. Negrea, O. Rossi, C. Brandt, S. Clare, P. Mastroeni, R. Rappuoli, A. Saul, C. A. MacLennan

Corresponding authors: Francesca Micoli, Rino Rappuoli  
Email: francesca.x.micoli@gsk.com, rino.r.rappuoli@gsk.com

### **This PDF file includes:**

Supplementary text  
Figs. S1 to S2  
References for SI reference citations

## Supplementary Information Text

### Materials and methods

#### *Bacterial strains*

*S. Typhimurium* 2189 was obtained from University of Calgary, Canada (*Salmonella* Genetic Stock Centre, SGSC) and belonged to the *Salmonella* reference collection A (SARA) (1). *S. Enteritidis* 618 was obtained from Quotient Bioresearch Limited, UK, and was isolated by the European Antimicrobial Susceptibility Surveillance in Animals (EASSA), coordinated by the European Animal Health Study Centre, Brussels (CEESA) (2). We previously selected these as potential sources of OAg for NTS OAg-conjugate vaccines (3). From these two strains, mutants were generated for GMMA production by replacing the *tolR* gene with the kanamycin resistance gene *aph*, as previously described (4). *S. Typhimurium* D23580 and *S. Enteritidis* D24954, endemic clinical isolates from Malawi (5, 6), obtained from the Malawi-Liverpool-Wellcome Trust Clinical Research Programme, Blantyre, Malawi, and the laboratory strain *S. Enteritidis* CMCC4314 (corresponding to ATCC4931), obtained from the Novartis Master Culture Collection (NMCC), were used for bactericidal assays and the mouse infection study. *Salmonella* strains employed in the SBA studies and challenge studies were different from those used to synthesise the vaccines. The strains were those used to establish the SBA (conducted at GVGH, Siena) and challenge model (conducted at WTSI, Cambridge). While the same *S. Typhimurium* strains was used in both systems, different *S. Enteritidis* strains were used for SBA and animal challenge studies.

#### *Immunogenicity studies*

Two studies were conducted to compare the immunogenicity of *S. Typhimurium* and *S. Enteritidis* GMMA and glycoconjugates in mice. The first study was performed at Toscana Life Science Animal Care Facility and was approved by the Italian Ministry of Health (Approval number AEC201309). The second study was performed at the Wellcome Trust Sanger Institute, under Project Licence PPL 80/2596 of the United Kingdom Animals (Scientific Procedures) Act 1986.

In both studies, five weeks old female C57BL/6 mice were immunised subcutaneously with 200  $\mu$ L of vaccine at day 0 and 28. Sera were collected at days -1, 14, 27 and 42. In the first study, 8 mice per group were injected with either monovalent formulations of GMMA or conjugates, both with Alhydrogel (0.7 mg/mL Al<sup>3+</sup> for GMMA and 2 mg/mL Al<sup>3+</sup> for OAg-CRM<sub>197</sub>). Different OAg doses were tested. Formulations at 1  $\mu$ g OAg/dose were also tested in the absence of Alhydrogel.

Individual mouse sera, collected at each time point, were tested for anti-OAg IgG antibodies response by enzyme-linked immunosorbent assay (ELISA) (3).

Determination of OAg-specific serum IgG subclasses (IgG1, IgG2a, IgG2b, IgG3) and IgM was performed by ELISA, using the kit Mouse Monoclonal Antibody Isotyping Reagents (Sigma-Aldrich). Round bottom Maxisorp microtitre plates (Nunc, Roskilde, Denmark) were coated with *S. Typhimurium* and *S. Enteritidis* OAg (at a concentration of 5  $\mu$ g/mL and 15  $\mu$ g/mL respectively in carbonate buffer) overnight at 4°C. Coating was then removed and plates blocked using PBS with 0.05% Tween 20 (Sigma) and 5% fat-free milk (Merck) for 2 hours at room temperature (RT). Serum samples were added and titrated in two-fold serial dilutions in PBS-0.05% Tween 20-0.1% bovine serum albumin (BSA) (diluent buffer) in 100  $\mu$ L/well. After incubation for 2 hours at RT, plates were washed with PBS-0.05% Tween 20, and incubated for 30 minutes RT with isotyping secondary antibodies (Sigma, ISO2-1KT), diluted 1:1000 in diluent buffer. After washing, plates were incubated for 30 minutes RT with the tertiary alkaline phosphatase-conjugate antibody anti-goat IgG, diluted 1:30000 in diluent buffer, and developed by adding the alkaline phosphatase substrate (Sigma, SIGMAFAST™ N2770). Plates were read

at 405 nm using ELx 800 reader (BioTek). Antibody titres were expressed as the reciprocal of the highest dilution with an optical density (OD) value  $\geq 0.2$  for anti-*S. Enteritidis* IgG subclasses or  $\geq 0.5$  for IgM and anti-*S. Typhimurium* IgG subclasses.

For each group, equal volumes of sera collected at day 42 from each mouse were pooled and tested for serum bactericidal activity (SBA) against *S. Typhimurium* and *S. Enteritidis* (3). Bactericidal activity was determined as the serum dilution needed to obtain a 50% reduction in colony forming units (CFU) after 3 hours incubation at 37 °C, in relation to the maximum growth of bacteria obtained in the test. To evaluate possible nonspecific inhibitory effects of baby rabbit complement (BRC) or mouse serum, bacteria were also incubated with SBA buffer and active BRC as a negative control, and with pooled sera from the control placebo group diluted at the same dilutions of the test sera (starting from 1:100) with active BRC. For all negative controls, no killing was observed at any of the concentrations tested.

In the second study, 12 mice per group were immunized with either bivalent formulations of GMMA or conjugate at 1  $\mu$ g OAg/dose for each antigen together with Alhydrogel. As part of this study, the ability of GMMA and conjugate vaccines to reduce bacterial numbers in the tissues was evaluated 17 days following second immunisation, with 6 mice from each group challenged intraperitoneally with 104 CFU of *S. Typhimurium* D23580 (5), and 6 mice with 104 CFU of *S. Enteritidis* D24954 (7). 24 hours post- challenge, mice were sacrificed by Schedule 1 method and spleens and livers collected for bacterial load determination. In both studies, a negative control group of mice received Alhydrogel.

As in the first study, individual mouse sera were collected at each time point and tested for anti-OAg IgG antibodies by ELISA (3). A high-throughput method using bacterial ATP measurement as survival readout (L-SBA) was used to evaluate SBA of single sera at day 42 from the second study (8). Previous work has shown the equivalence between serum titres calculated with the standard CFU-counting method and the luminescence-based method.

### *Statistics*

Statistical and graphical analysis was performed using GraphPad Prism 6 software. The non-parametric Mann-Whitney test (two-tailed) and Kruskal-Wallis analysis with Dunn's test for post hoc analysis were used to compare two or multiple groups, respectively.

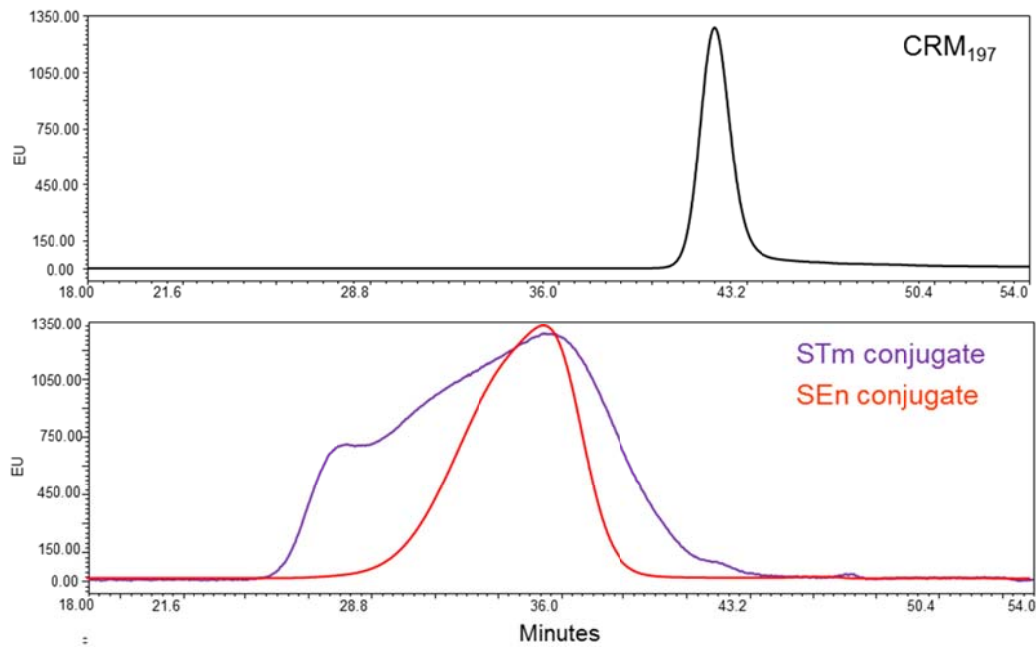

**Fig. S1.** HPLC-SEC profiles (fluorescence emission detection) of OAg-CRM<sub>197</sub> conjugates compared with unconjugated CRM<sub>197</sub> (80  $\mu$ L injected at 100  $\mu$ g/mL protein concentration).

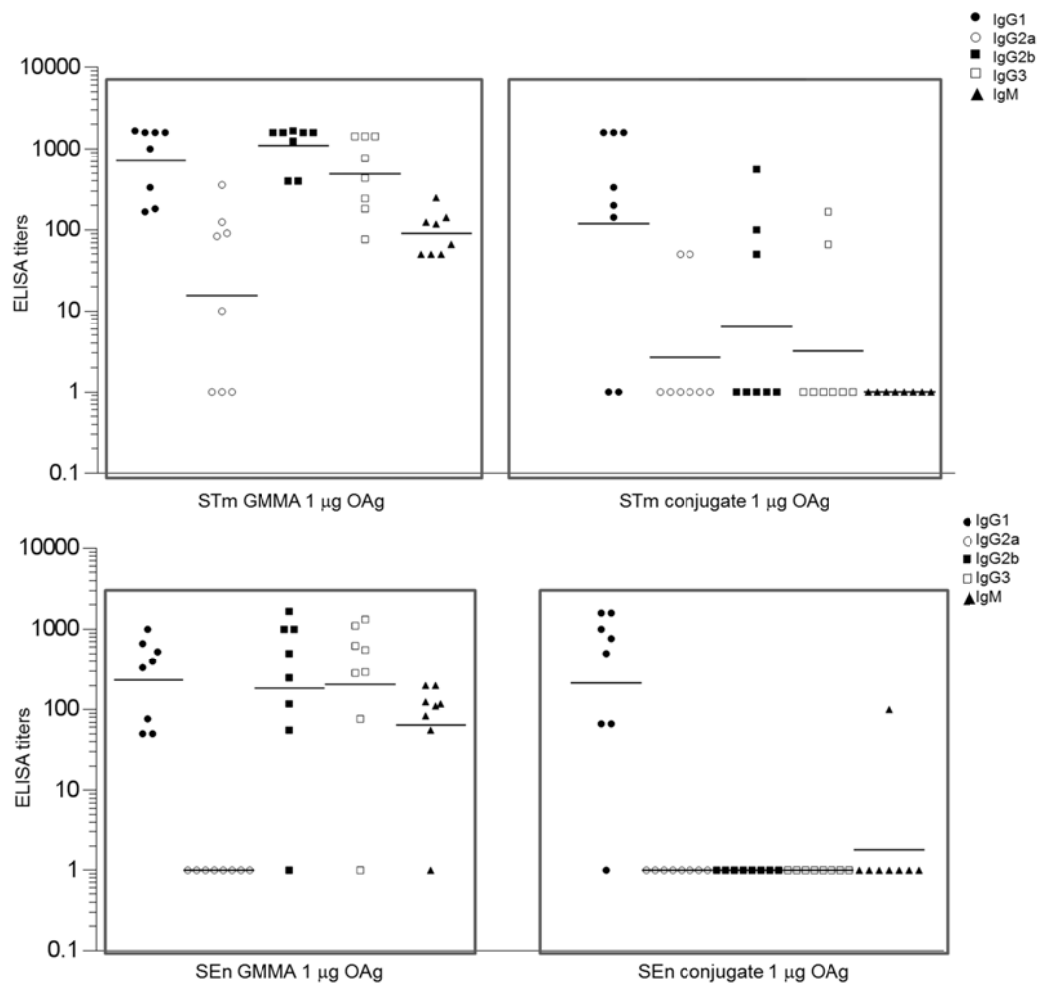

**Fig. S2.** IgM and IgG subclasses analysis of day 42 sera from mice immunized with GMMA or conjugate at 1 µg OAg dose with Alhydrogel. Summary graphs of individual antibody levels (dots) and geometric means (horizontal lines).

## References

1. Beltran P, et al. (1991) Reference collection of strains of the Salmonella typhimurium complex from natural populations. *Journal of general microbiology* 137(3):601-606.
2. de Jong A, et al. (2013) Pan-European resistance monitoring programmes encompassing food-borne bacteria and target pathogens of food-producing and companion animals. *International journal of antimicrobial agents* 41(5):403-409.
3. Lanzilao L, et al. (2015) Strain Selection for Generation of O-Antigen-Based Glycoconjugate Vaccines against Invasive Nontyphoidal Salmonella Disease. *PLoS One* 10(10):e0139847.
4. Rossi O, et al. (2016) Toll-Like Receptor Activation by Generalized Modules for Membrane Antigens from Lipid A Mutants of Salmonella enterica Serovars Typhimurium and Enteritidis. *Clinical and vaccine immunology : CVI* 23(4):304-314.
5. Kingsley RA MC, Thomson NR, Kariuki S, Holt SE, Gordon MA, Harris D et al. (2009) Epidemic multiple drug resistant Salmonella Typhimurium causing invasive disease in sub-Saharan Africa have a distinct genotype. *Genome Res* 19(12):2279-2287.
6. MacLennan CA GE, Msefula CL, Kingsley RA, Thomson NR, White, NR et al. (2008) The neglected role of antibody in protection against bacteremia caused by nontyphoidal strains of Salmonella in African children. *J Clin Invest* 118(4):1553-1562.
7. Siggins MK, et al. (2014) Differential timing of antibody-mediated phagocytosis and cell-free killing of invasive African Salmonella allows immune evasion. *European journal of immunology* 44(4):1093-1098.
8. Necchi F, Saul A, Rondini S (2017) Development of a high-throughput method to evaluate serum bactericidal activity using bacterial ATP measurement as survival readout. *PLoS One* 12(2):e0172163.
